# Supplementary material for: 1,4-Dihydrophosphinolines and their complexes with group 10 metals
Source: Royal Society of Chemistry journal article supplement (doi:10.1039/c5nj03038b), 2016-01-01
Supplement: c5nj03038b1.pdf [file c5nj03038b1.pdf]

**Supplementary Information**

**1,4-Dihydrophosphinolines and Their Complexes with Group  
10 Metals**

Margarita A. Klingenberg, Alexander S. Bogachenkov, Mikhail A. Kinzhalov,

Aleksander V. Vasilyev and Vadim P. Boyarskiy

St. Petersburg State University, 7/9, Universitetskaya nab., St. Petersburg, 199034

Russia

Department of Chemistry, St. Petersburg State Forest Technical University, Institutsky

per., 5, St. Petersburg, 194021 Russia.

**Contents:**

Crystal data and structure refinement for *2b*, *trans*-5, *cis*-6, *trans*-7, *trans*-8 and *cis*-8 .....3  
NMR spectra .....5

## Crystal data and structure refinement for *2b*, *trans-5*, *cis-6*, *trans-7*, *trans-8* and *cis-8*

Table S1. Summary of crystal data, data collection and structure refinement for the X-ray diffraction study of complexes *2b*, *trans-5*, *cis-6*, *trans-7*, *trans-8*, and *cis-8*.

|                                    | <b>2b</b>                                                      | <b><i>trans-5</i></b>                                             | <b><i>cis-6</i></b>                                               | <b><i>trans-7</i></b>                                                | <b><i>trans-8</i></b>                                                | <b><i>cis-8</i></b>                                                               |
|------------------------------------|----------------------------------------------------------------|-------------------------------------------------------------------|-------------------------------------------------------------------|----------------------------------------------------------------------|----------------------------------------------------------------------|-----------------------------------------------------------------------------------|
| CCD number                         | 1426280                                                        | 1432271                                                           | 1432270                                                           | 1432267                                                              | 1432269                                                              | 1432268                                                                           |
| identification code                | asb598                                                         | KP_4                                                              | KP3                                                               | km868last                                                            | kp1_new                                                              | KMA-805                                                                           |
| Empirical formula                  | C <sub>34</sub> H <sub>32</sub> P <sub>2</sub> Br <sub>2</sub> | C <sub>34</sub> H <sub>34</sub> Cl <sub>2</sub> P <sub>2</sub> Pd | C <sub>34</sub> H <sub>34</sub> Cl <sub>2</sub> P <sub>2</sub> Pt | C <sub>18</sub> H <sub>18</sub> BrCl <sub>3</sub> PPd <sub>0.5</sub> | C <sub>18</sub> H <sub>18</sub> BrCl <sub>3</sub> PPt <sub>0.5</sub> | C <sub>34</sub> H <sub>32</sub> Br <sub>2</sub> Cl <sub>2</sub> P <sub>2</sub> Pt |
| Formula weight                     | 662.36                                                         | 681.92                                                            | 770.54                                                            | 504.75                                                               | 549.10                                                               | 928.34                                                                            |
| Temperature/K                      | 100.01(10)                                                     | 100(2)                                                            | 100.01(10)                                                        | 293(2)                                                               | 100.01(10)                                                           | 100.00(10)                                                                        |
| Crystal system                     | monoclinic                                                     | monoclinic                                                        | monoclinic                                                        | triclinic                                                            | triclinic                                                            | monoclinic                                                                        |
| Space group                        | P2 <sub>1</sub> /c                                             | P2 <sub>1</sub> /n                                                | P2 <sub>1</sub> /n                                                | P-1                                                                  | P-1                                                                  | P2 <sub>1</sub> /n                                                                |
| a/Å                                | 20.3791(3)                                                     | 12.2369(4)                                                        | 11.9317(6)                                                        | 8.7824(4)                                                            | 8.7628(3)                                                            | 11.3816(3)                                                                        |
| b/Å                                | 10.08862(14)                                                   | 8.2187(2)                                                         | 15.5172(6)                                                        | 11.1066(6)                                                           | 11.1119(5)                                                           | 18.9270(4)                                                                        |
| c/Å                                | 15.5172(2)                                                     | 15.0367(5)                                                        | 16.9442(8)                                                        | 11.4473(6)                                                           | 11.4634(5)                                                           | 16.0478(4)                                                                        |
| α/°                                | 90.00                                                          | 90                                                                | 90                                                                | 103.246(5)                                                           | 103.369(4)                                                           | 90                                                                                |
| β/°                                | 110.0486(17)                                                   | 91.105(3)                                                         | 100.854(5)                                                        | 106.855(5)                                                           | 106.943(3)                                                           | 109.582(3)                                                                        |
| γ/°                                | 90.00                                                          | 90                                                                | 90                                                                | 107.784(5)                                                           | 107.517(3)                                                           | 90                                                                                |
| Volume/Å <sup>3</sup>              | 2996.96(8)                                                     | 1511.98(8)                                                        | 3081.0(2)                                                         | 953.72(9)                                                            | 953.98(7)                                                            | 3257.08(15)                                                                       |
| Z                                  | 4                                                              | 2                                                                 | 4                                                                 | 2                                                                    | 2                                                                    | 4                                                                                 |
| ρ <sub>calc</sub> /cm <sup>3</sup> | 1.468                                                          | 1.4977                                                            | 1.661                                                             | 1.758                                                                | 1.912                                                                | 1.893                                                                             |
| μ/mm <sup>-1</sup>                 | 4.596                                                          | 7.741                                                             | 11.258                                                            | 3.112                                                                | 14.199                                                               | 7.048                                                                             |
| F(000)                             | 1344.0                                                         | 700.4                                                             | 1520.0                                                            | 500.0                                                                | 532.0                                                                | 1792.0                                                                            |
| Crystal size/mm <sup>3</sup>       | 0.15 × 0.12 × 0.07                                             | 0.23 × 0.16 × 0.10                                                | 0.1042 × 0.0925 × 0.0773                                          | 0.24 × 0.16 × 0.10                                                   | 0.12 × 0.10 × 0.08                                                   | 0.2 × 0.2 × 0.2                                                                   |
| Radiation                          | Cu Kα (λ = 1.54184)                                            | Cu Kα (λ = 1.54184)                                               | Cu Kα (λ = 1.54184)                                               | Mo Kα (λ = 0.71073)                                                  | CuKα (λ = 1.54184)                                                   | MoKα (λ = 0.71073)                                                                |
| 2θ range for data collection/°     | 9.24 to 152.7°                                                 | 9.24 to 152.42                                                    | 7.79 to 144.992                                                   | 5.24 to 54.98                                                        | 8.606 to 144.92                                                      | 5.344 to 55                                                                       |

|                                             |                                                   |                                                               |                                                               |                                                               |                                                               |                                                               |
|---------------------------------------------|---------------------------------------------------|---------------------------------------------------------------|---------------------------------------------------------------|---------------------------------------------------------------|---------------------------------------------------------------|---------------------------------------------------------------|
| Index ranges                                | -25 ≤ h ≤ 25, -12 ≤ k ≤ 12, -19 ≤ l ≤ 19          | -14 ≤ h ≤ 15, -10 ≤ k ≤ 10, -18 ≤ l ≤ 18                      | -14 ≤ h ≤ 14, -11 ≤ k ≤ 19, -20 ≤ l ≤ 20                      | -10 ≤ h ≤ 11, -14 ≤ k ≤ 14, -14 ≤ l ≤ 14                      | -9 ≤ h ≤ 10, -13 ≤ k ≤ 13, -14 ≤ l ≤ 14                       | -13 ≤ h ≤ 14, -24 ≤ k ≤ 24, -20 ≤ l ≤ 12                      |
| Reflections collected                       | 38236                                             | 18145                                                         | 21352                                                         | 7578                                                          | 13901                                                         | 25858                                                         |
| Independent reflections                     | 6269 [R <sub>int</sub> = 0.0349]                  | 3166 [R <sub>int</sub> = 0.0462, R <sub>sigma</sub> = 0.0271] | 6094 [R <sub>int</sub> = 0.0746, R <sub>sigma</sub> = 0.0582] | 4114 [R <sub>int</sub> = 0.0263, R <sub>sigma</sub> = 0.0454] | 3786 [R <sub>int</sub> = 0.0406, R <sub>sigma</sub> = 0.0335] | 7480 [R <sub>int</sub> = 0.0271, R <sub>sigma</sub> = 0.0242] |
| Data/restraints/parameters                  | 6269/0/347                                        | 3166/0/179                                                    | 6094/0/356                                                    | 4114/0/198                                                    | 3786/0/216                                                    | 7480/0/374                                                    |
| Goodness-of-fit on F <sup>2</sup>           | 1.016                                             | 1.187                                                         | 1.077                                                         | 1.045                                                         | 1.103                                                         | 1.123                                                         |
| Final R indexes [I ≥ 2σ (I)]                | R <sub>1</sub> = 0.0275, wR <sub>2</sub> = 0.0735 | R <sub>1</sub> = 0.0398, wR <sub>2</sub> = 0.1346             | R <sub>1</sub> = 0.0565, wR <sub>2</sub> = 0.1454             | R <sub>1</sub> = 0.0511, wR <sub>2</sub> = 0.1245             | R <sub>1</sub> = 0.0209, wR <sub>2</sub> = 0.0492             | R <sub>1</sub> = 0.0238, wR <sub>2</sub> = 0.0538             |
| Final R indexes [all data]                  | R <sub>1</sub> = 0.0305, wR <sub>2</sub> = 0.0765 | R <sub>1</sub> = 0.0452, wR <sub>2</sub> = 0.1434             | R <sub>1</sub> = 0.0743, wR <sub>2</sub> = 0.1692             | R <sub>1</sub> = 0.0631, wR <sub>2</sub> = 0.1339             | R <sub>1</sub> = 0.0253, wR <sub>2</sub> = 0.0507             | R <sub>1</sub> = 0.0282, wR <sub>2</sub> = 0.0556             |
| Largest diff. peak/hole / e Å <sup>-3</sup> | 0.49/-0.39                                        | 1.48/-0.71                                                    | 3.98/-2.15                                                    | 2.65/-0.50                                                    | 1.00/-0.52                                                    | 1.77/-0.77                                                    |

**Table S2. Distance from selected atom to plane P1–Cl1–Cl2–P1A–Pt1 (Å) for complexes *cis-6* and *cis-8*.**

| Selected atom | Distance from selected atom to plane P1–Cl1–Cl2–P1A–Pt1 (Å) |              |
|---------------|-------------------------------------------------------------|--------------|
|               | <i>cis-6</i>                                                | <i>cis-8</i> |
| Pt1           | -0.0143(9)                                                  | 0.0130(4)    |
| P1            | -0.0253(11)                                                 | 0.2131(4)    |
| P1A           | 0.0350(11)                                                  | -0.2234(4)   |
| Cl1           | 0.0341(11)                                                  | -0.2317(4)   |
| Cl2           | -0.0296(12)                                                 | 0.2290(4)    |

# NMR spectra

2a

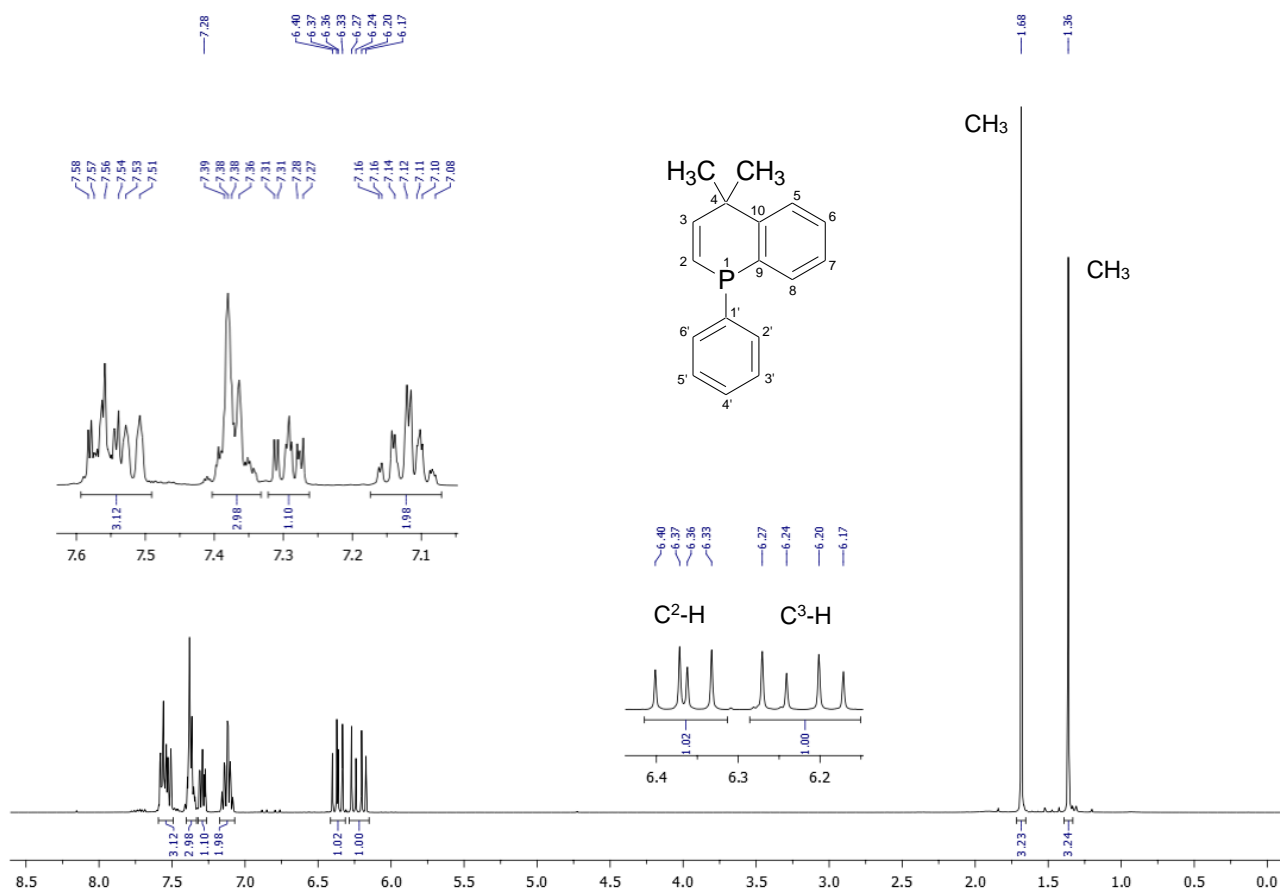

Fig. S1.  $^1\text{H}$  NMR spectrum of the compound **2a** ( $\text{CDCl}_3$ ).

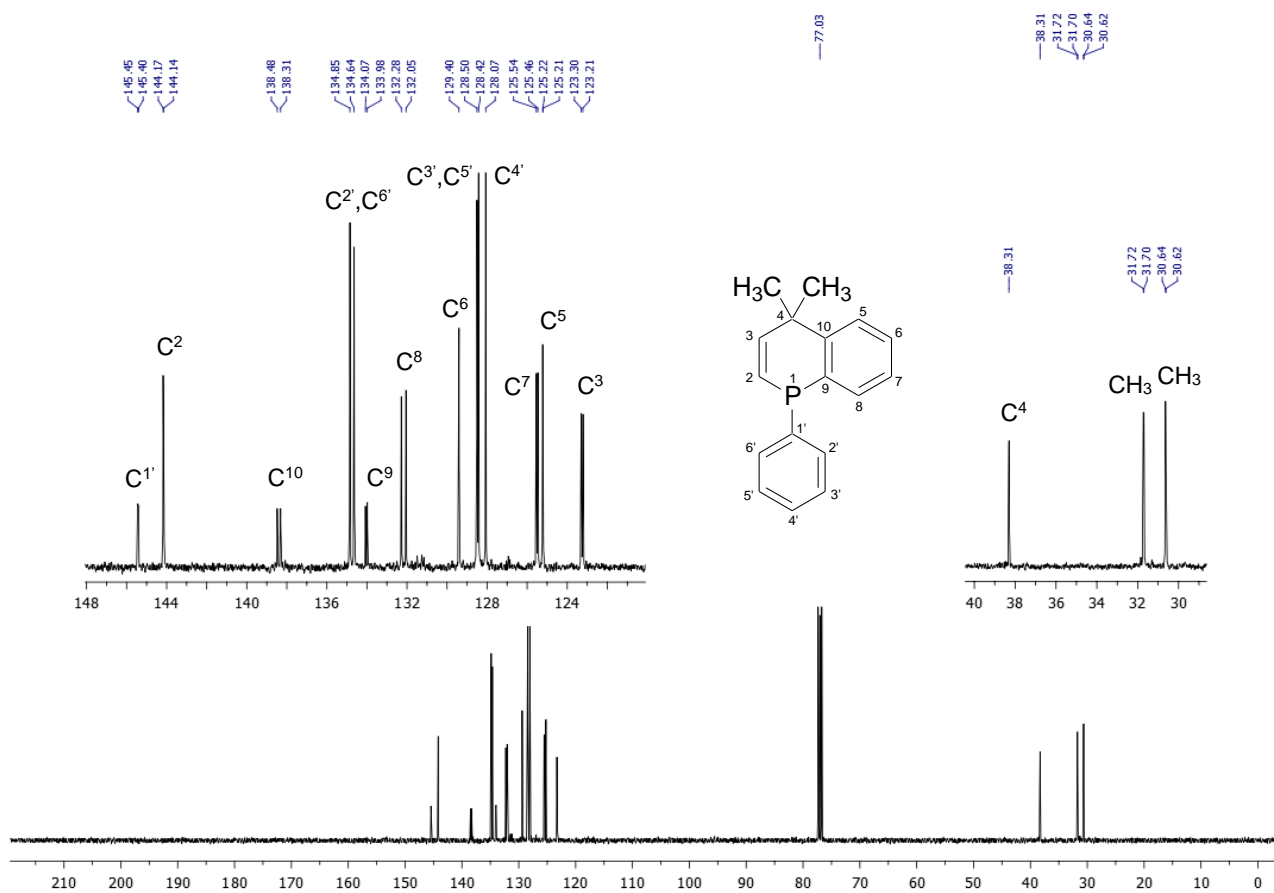

Fig. S2. <sup>13</sup>C{<sup>1</sup>H} NMR spectrum of the compound **2a** (CDCl<sub>3</sub>).

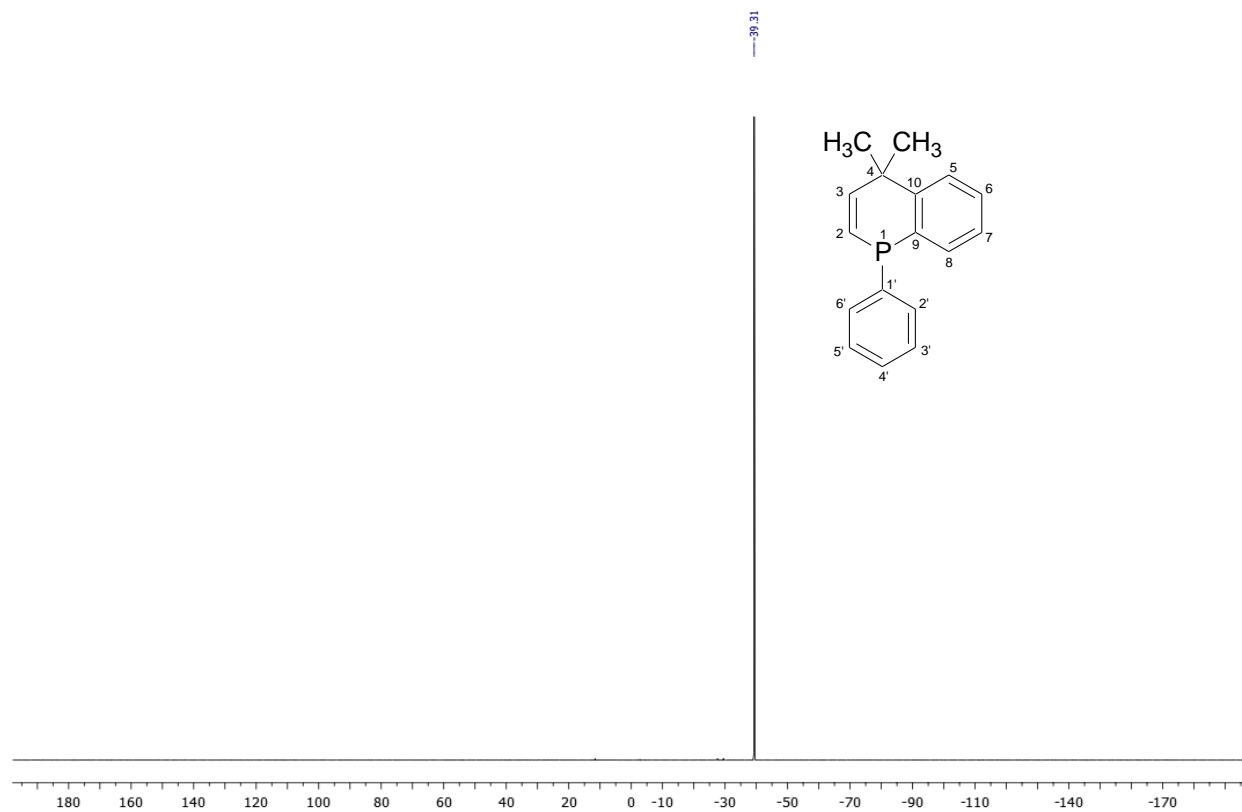

Fig. S3. <sup>31</sup>P{<sup>1</sup>H} NMR spectrum of the compound **2a** (CDCl<sub>3</sub>).

2b

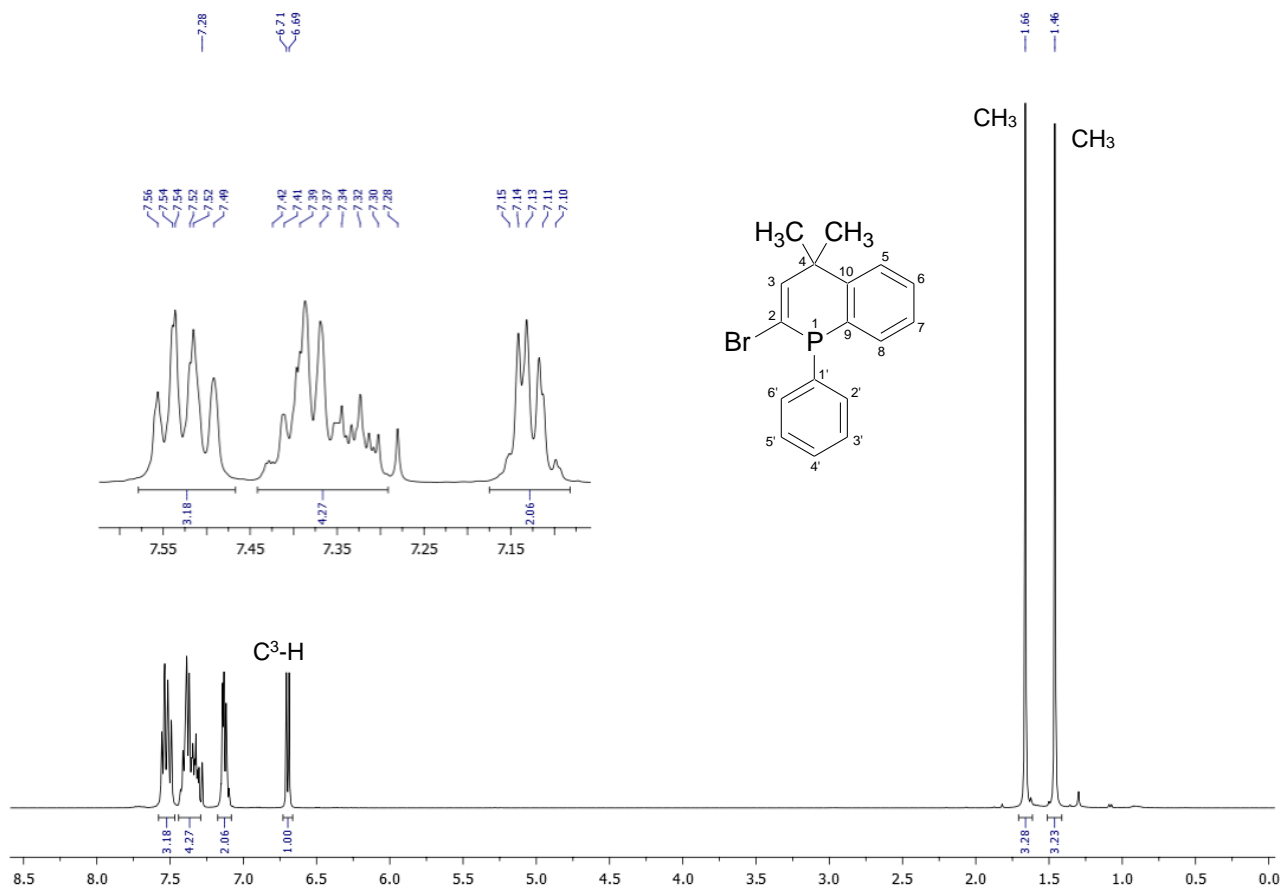

Fig. S4.  $^1\text{H}$  NMR spectrum of the compound **2b** ( $\text{CDCl}_3$ ).

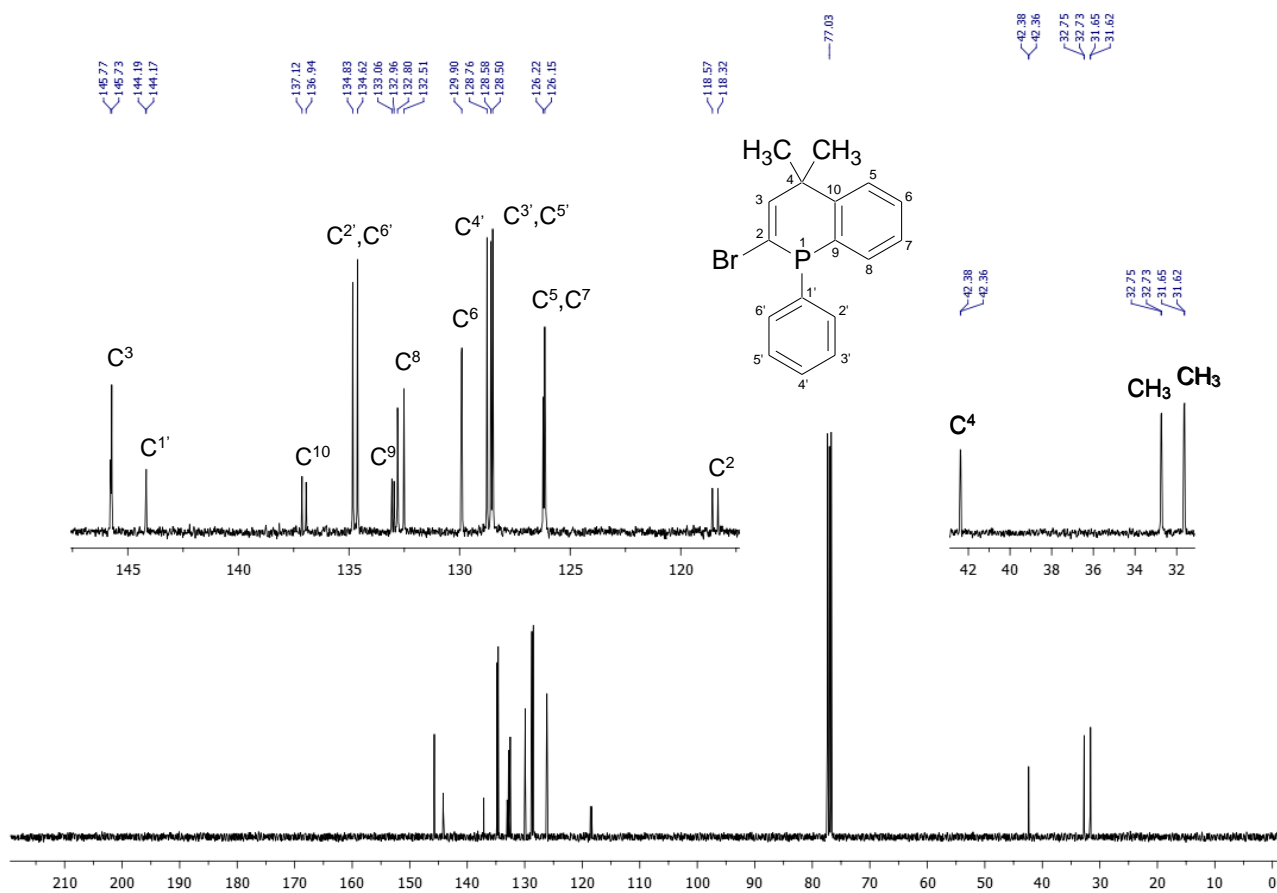

Fig. S5. <sup>13</sup>C{<sup>1</sup>H} NMR spectrum of the compound **2b** (CDCl<sub>3</sub>).

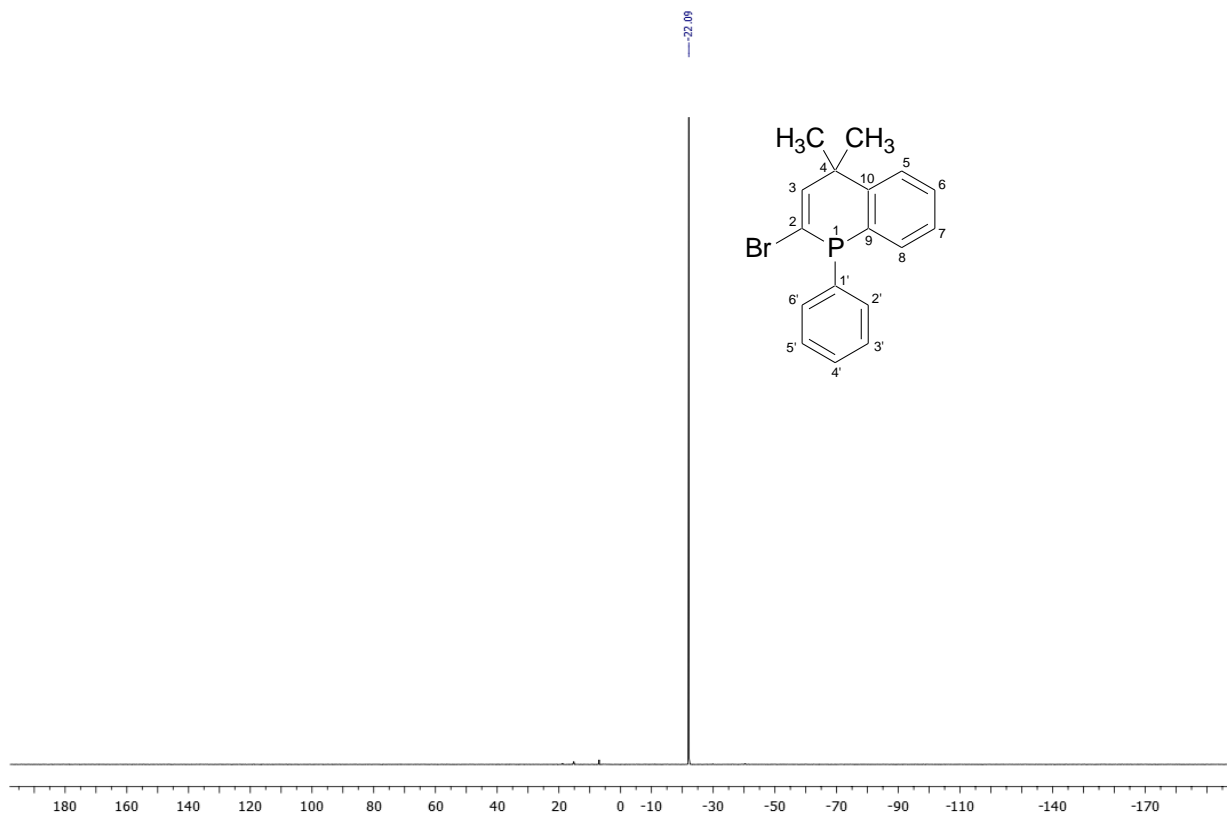

Fig. S6. <sup>31</sup>P{<sup>1</sup>H} NMR spectrum of the compound **2b** (CDCl<sub>3</sub>).



**trans-5**

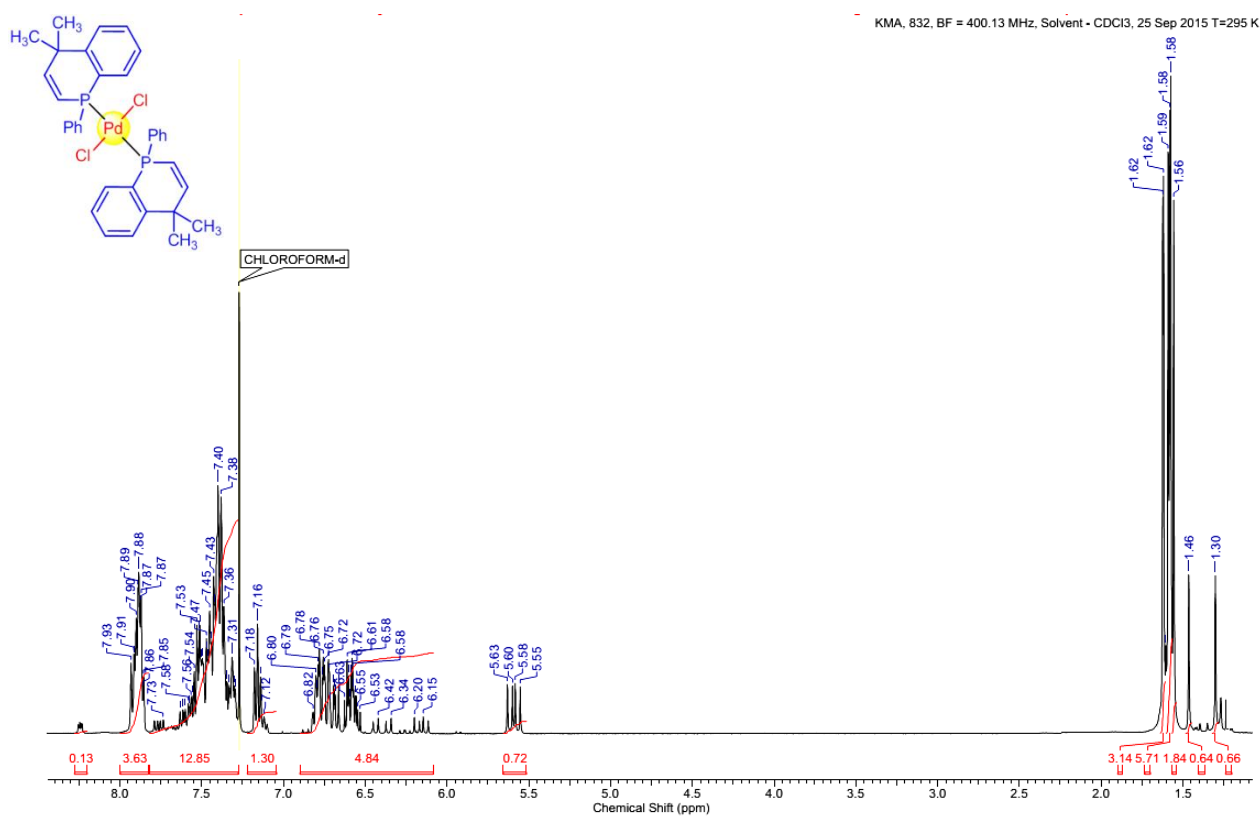

Fig. S7. <sup>1</sup>H NMR spectrum of the compound **5** (CDCl<sub>3</sub>, mixture of *cis*- and *trans*- isomers).

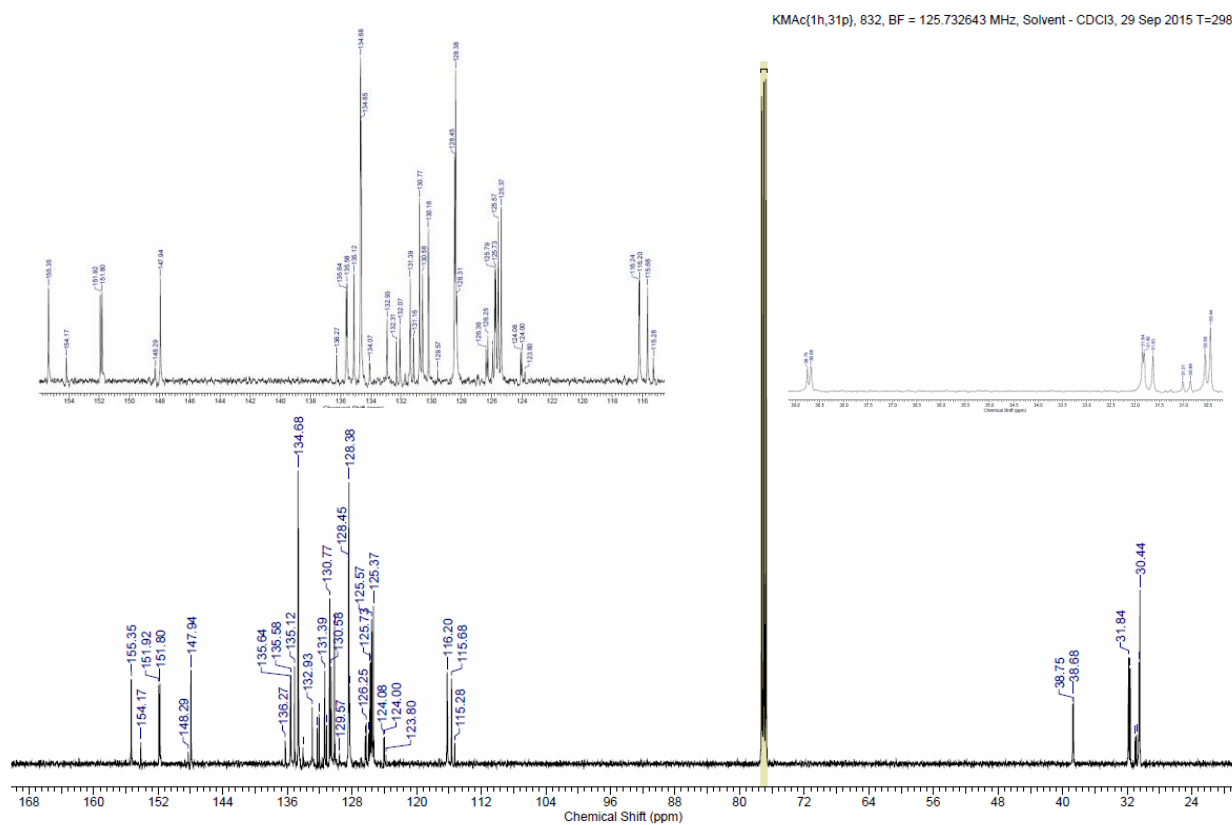

Fig. S8. <sup>13</sup>C{<sup>1</sup>H, <sup>31</sup>P} NMR spectrum of the compound **5** (CDCl<sub>3</sub>, mixture of *cis*- and *trans*- isomers).

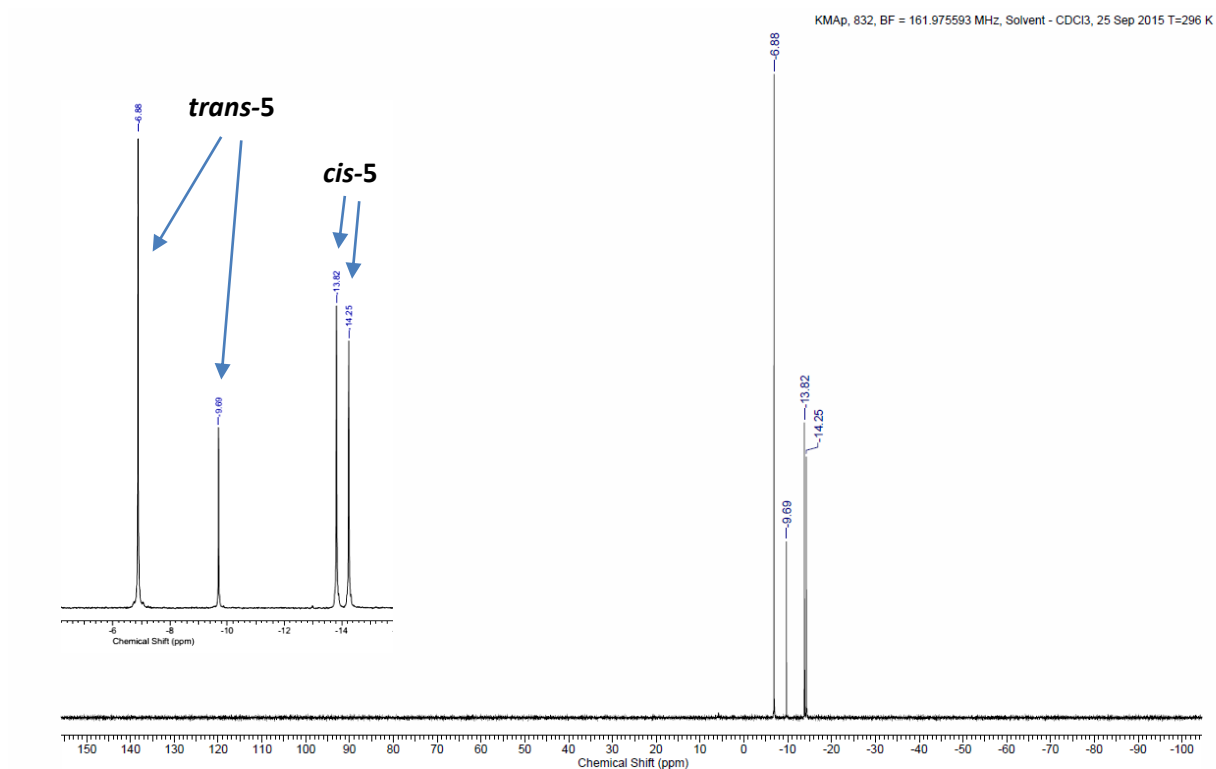

Fig. S9.  $^{31}\text{P}\{^1\text{H}\}$  NMR spectrum of the compound **5** ( $\text{CDCl}_3$ , mixture of *cis*- and *trans*- isomers).

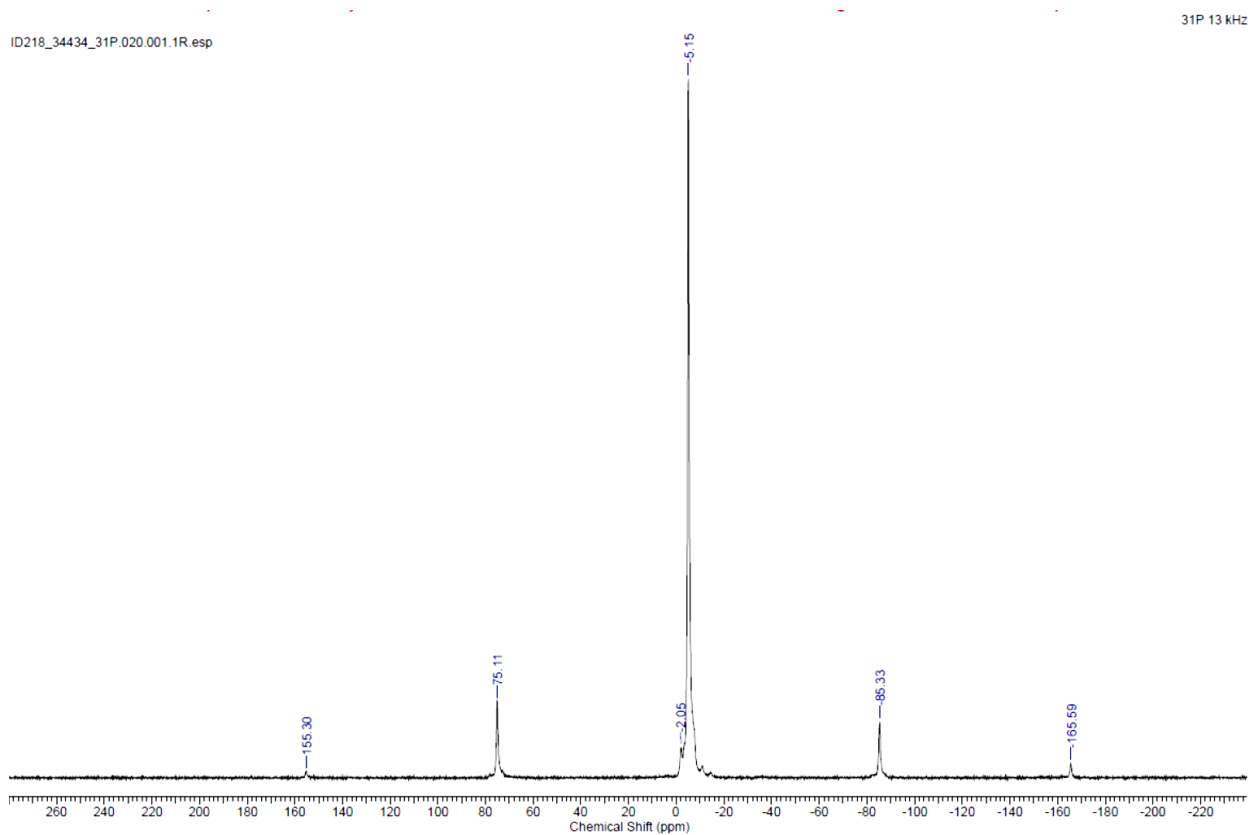

Fig. S10.  $^{31}\text{P}$  MAS NMR spectrum of the compound ***trans*-5**.

*cis-6*

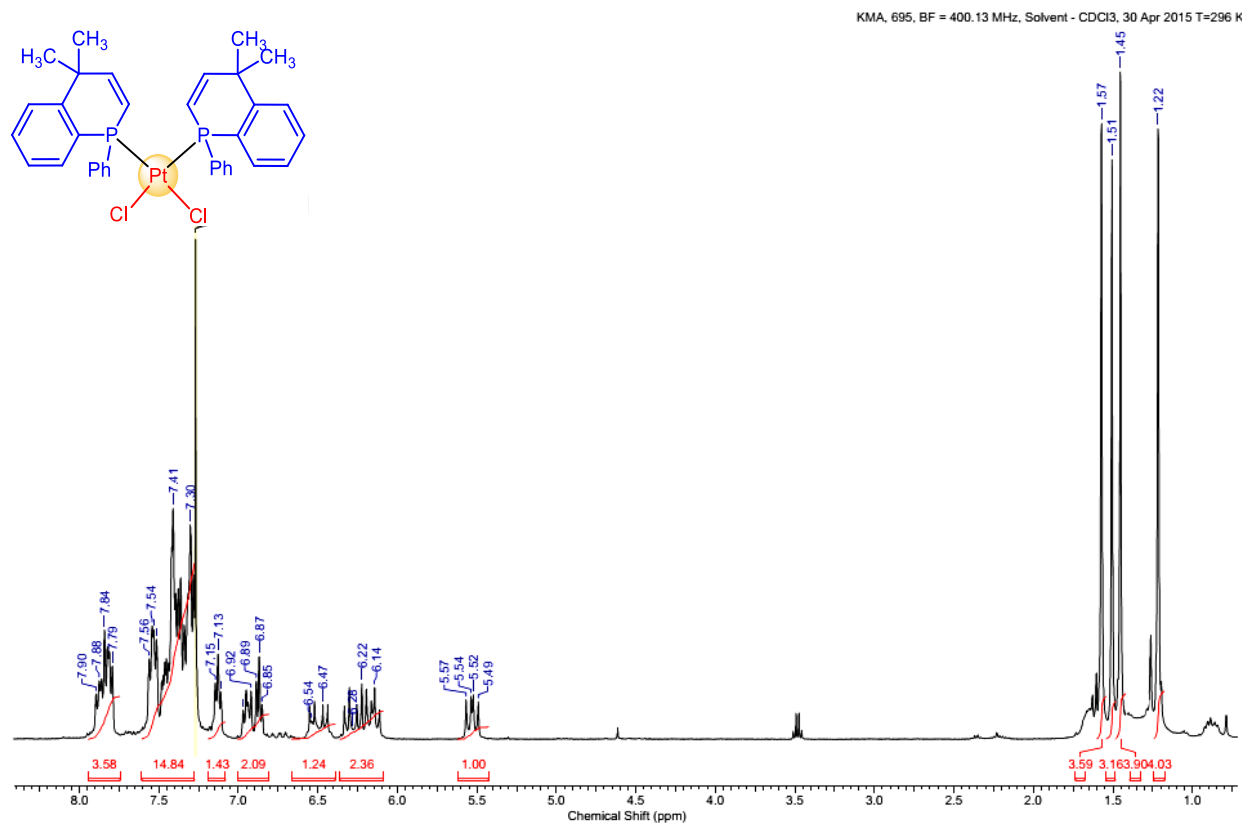

Fig. S11. <sup>1</sup>H NMR spectrum of the compound *cis-6* (CDCl<sub>3</sub>).

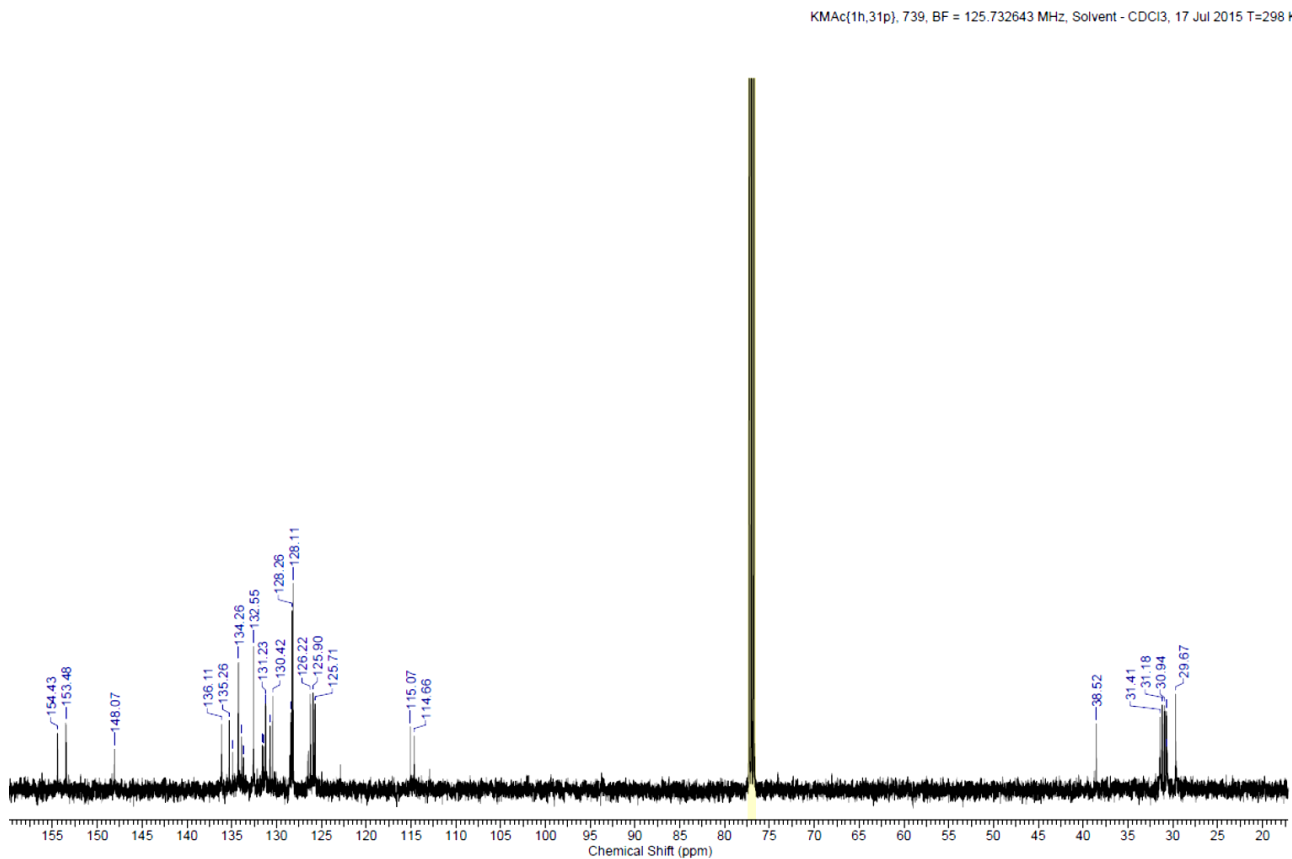

Fig. S12. <sup>13</sup>C{<sup>1</sup>H, <sup>31</sup>P} NMR spectrum of the compound *cis-6* (CDCl<sub>3</sub>).

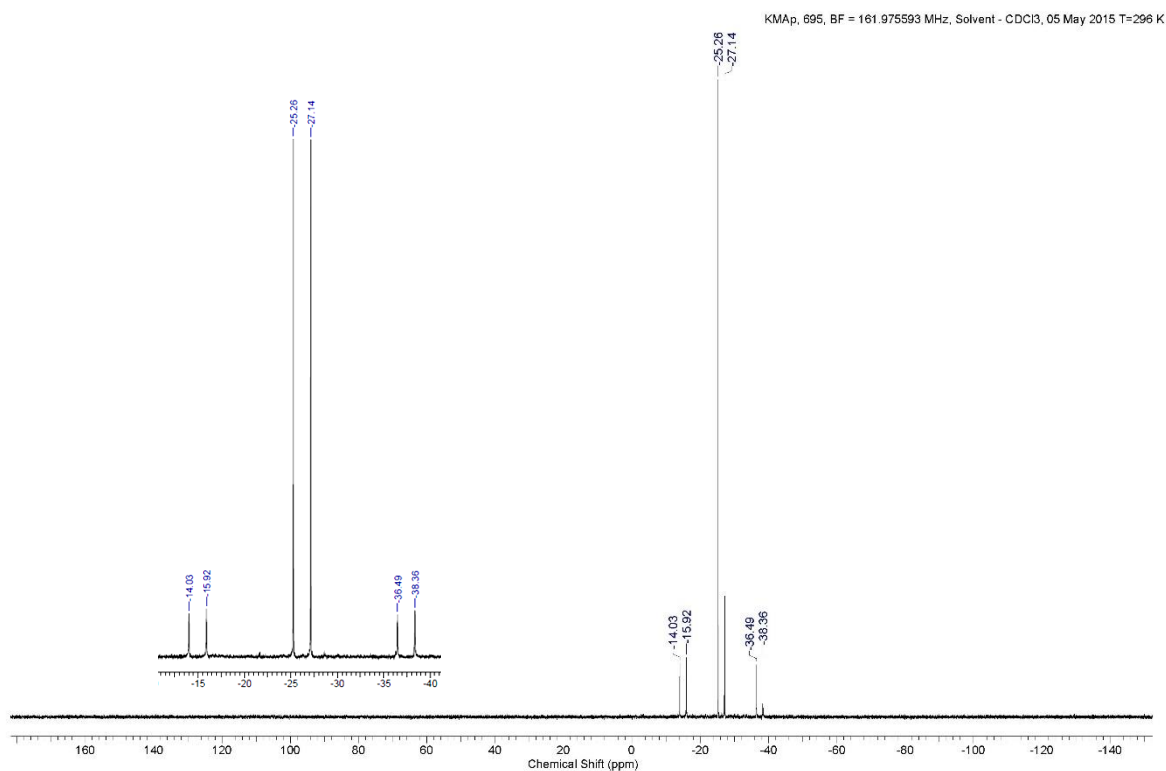

Fig. S13.  $^{31}\text{P}\{^1\text{H}\}$  NMR spectrum of the compound *cis-6* ( $\text{CDCl}_3$ ).

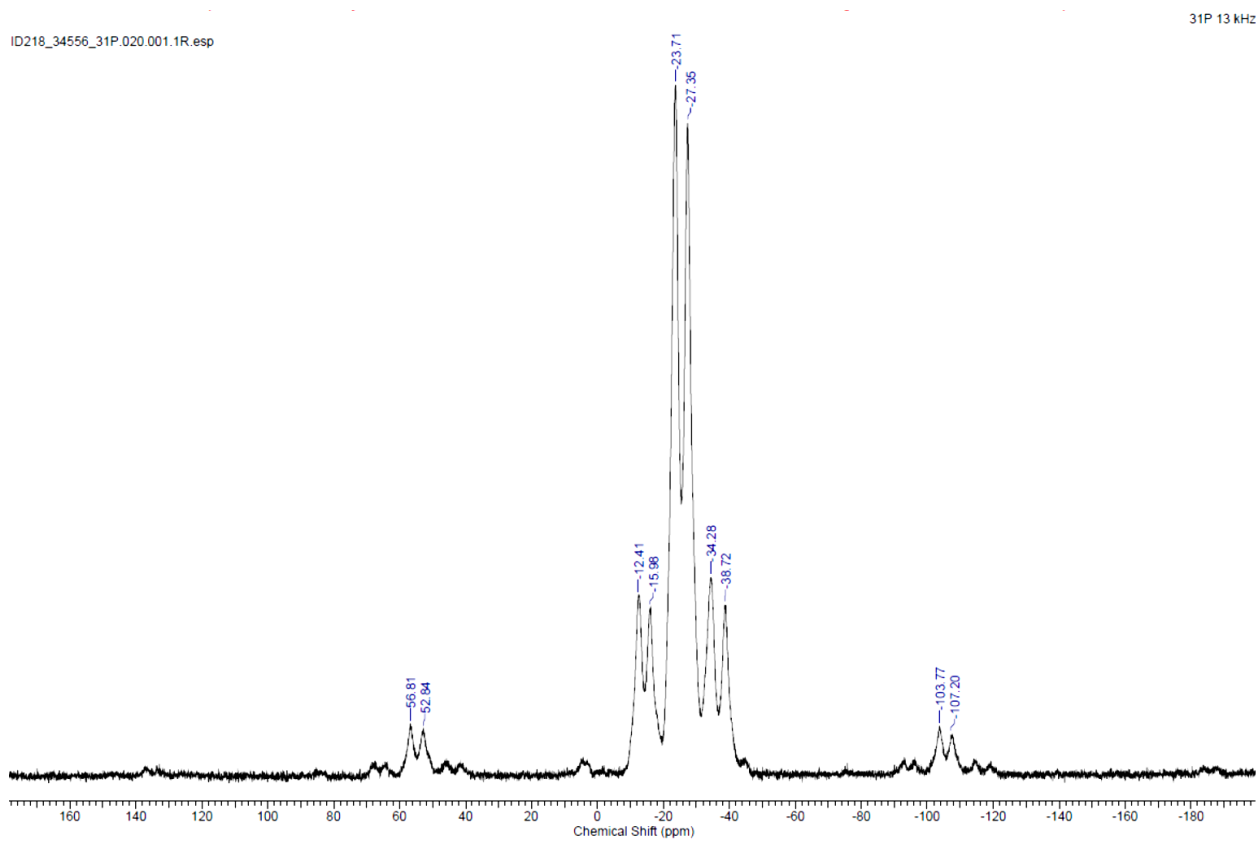

Fig. S14.  $^{31}\text{P}$  MAS NMR spectrum of the compound *cis-6*.

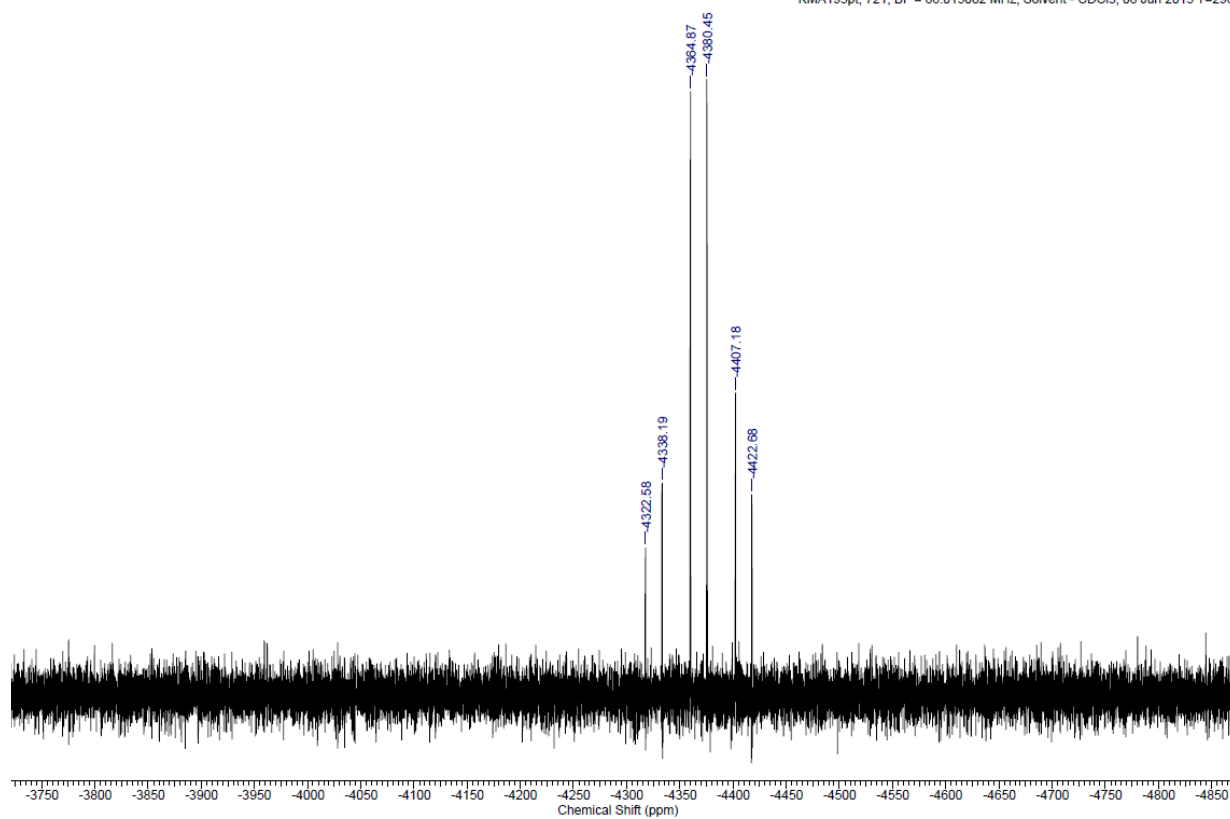

Fig. S15. <sup>195</sup>Pt NMR spectrum of the compound *cis-6* (CDCl<sub>3</sub>).

**trans-7**

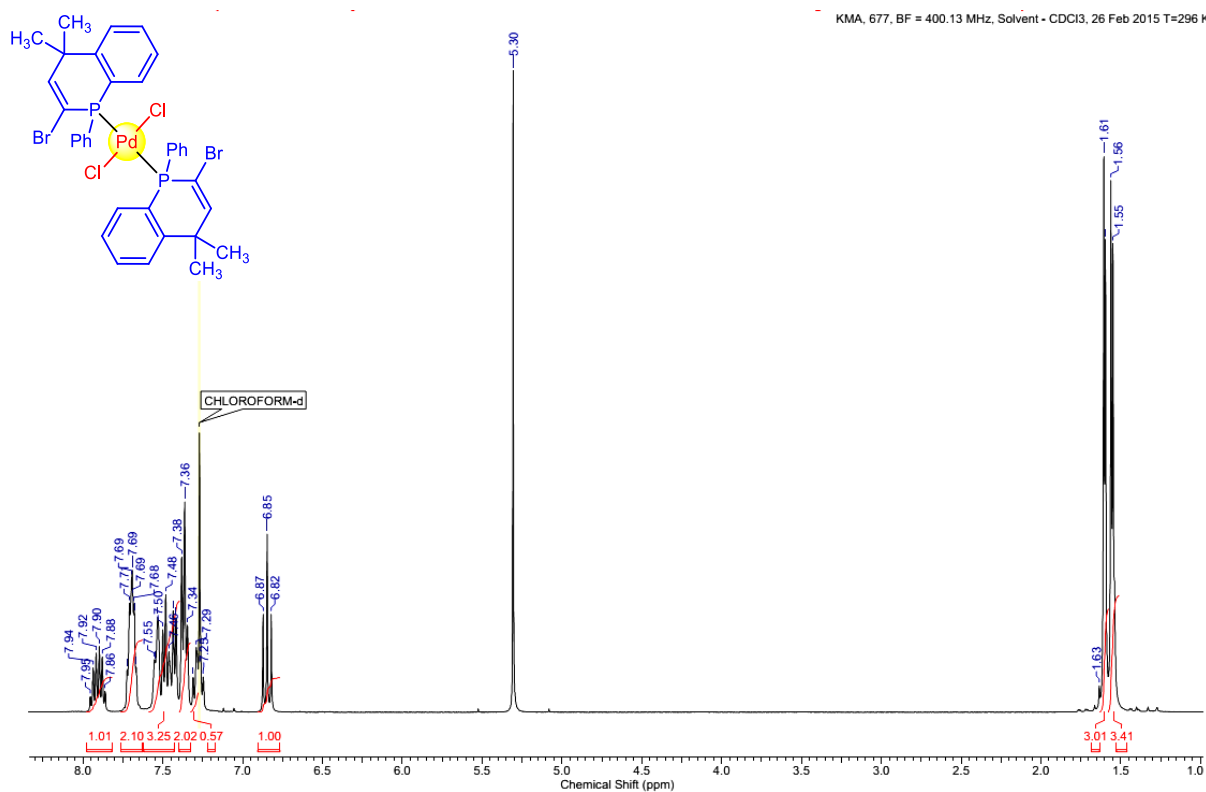

Fig. S16. <sup>1</sup>H NMR spectrum of the compound **trans-7** (CDCl<sub>3</sub>).

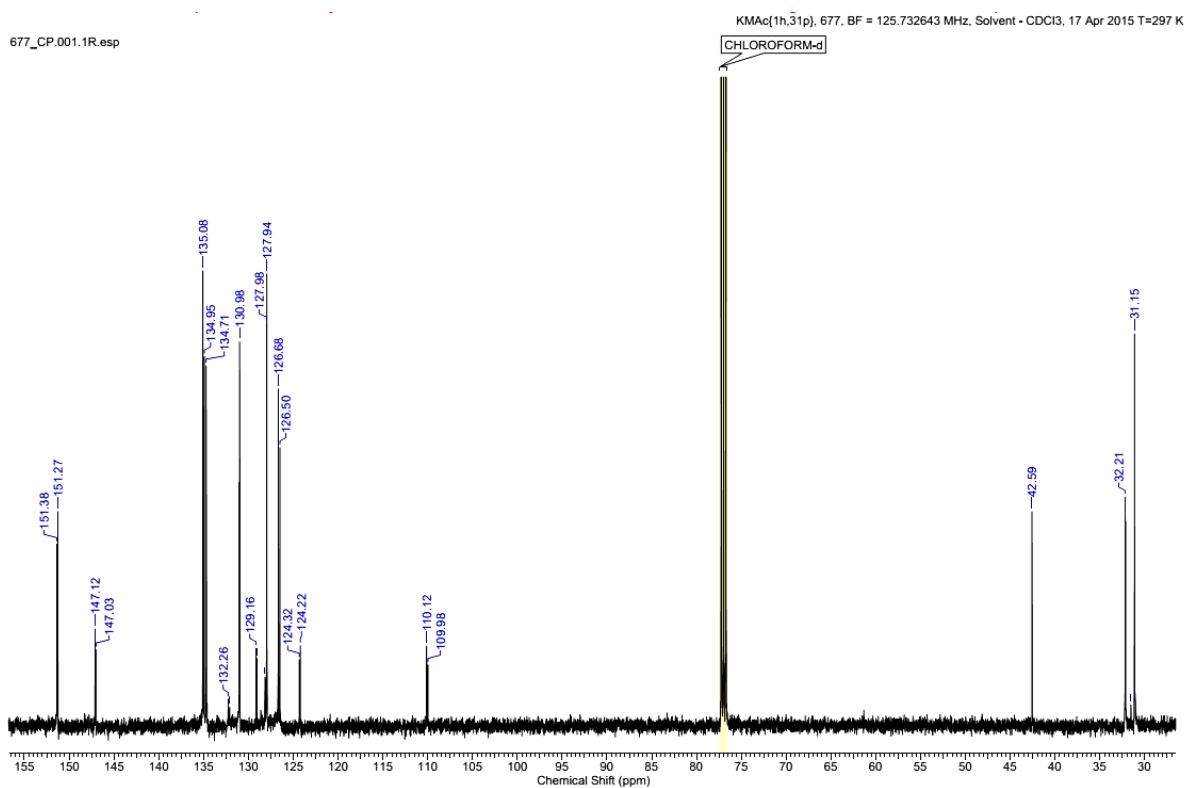

Fig. S17. <sup>13</sup>C{<sup>1</sup>H, <sup>31</sup>P} NMR spectrum of the compound **trans-7** (CDCl<sub>3</sub>).

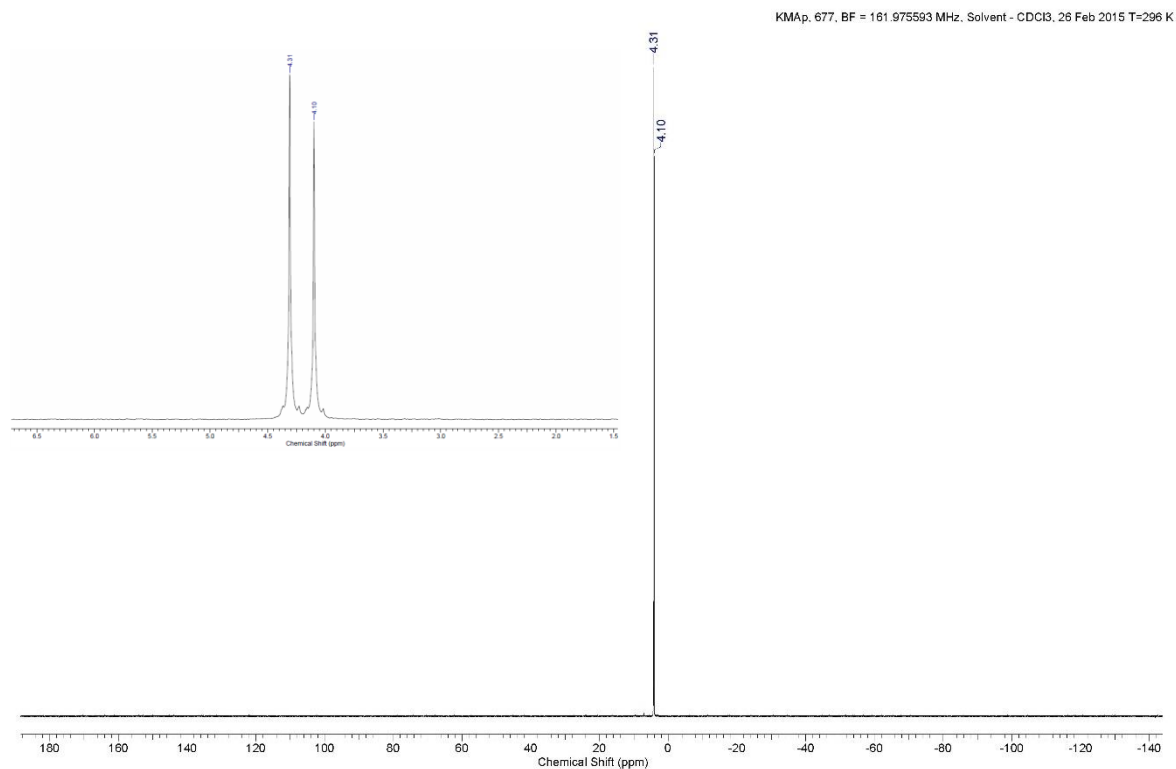

Fig. S18. <sup>31</sup>P{<sup>1</sup>H} NMR spectrum of the compound *trans-7* (CDCl<sub>3</sub>).

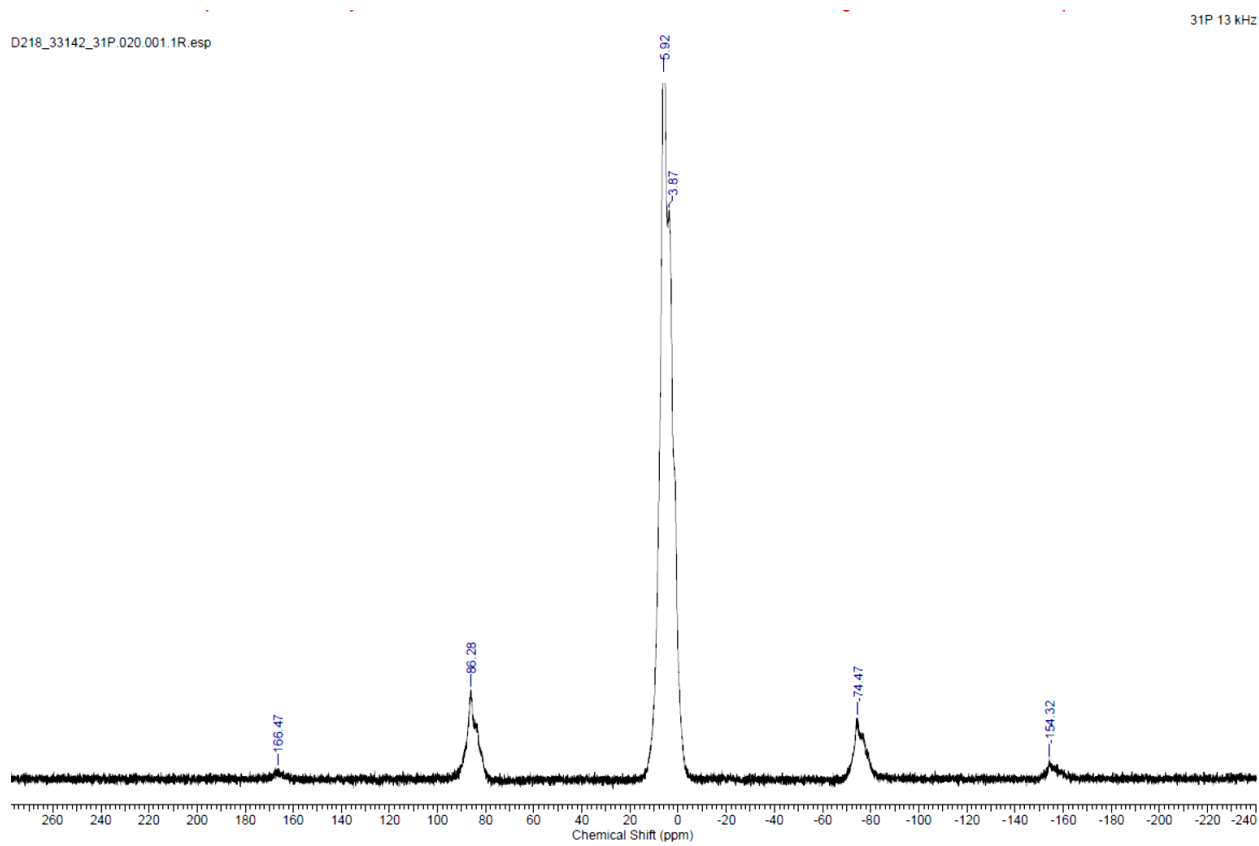

Fig. S19. <sup>31</sup>P MAS NMR spectrum of the compound *trans-7*.

**trans-8**

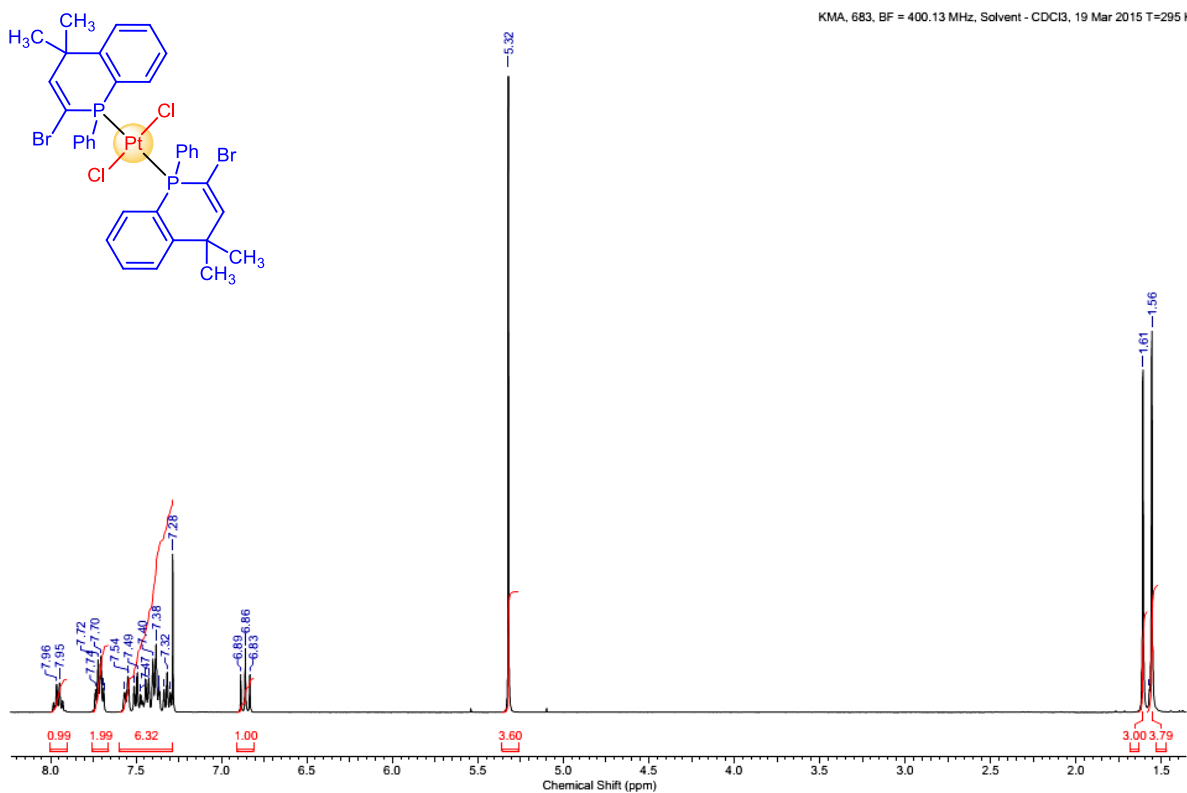

Fig. S20. <sup>1</sup>H NMR spectrum of the compound **trans-8** (CDCl<sub>3</sub>).

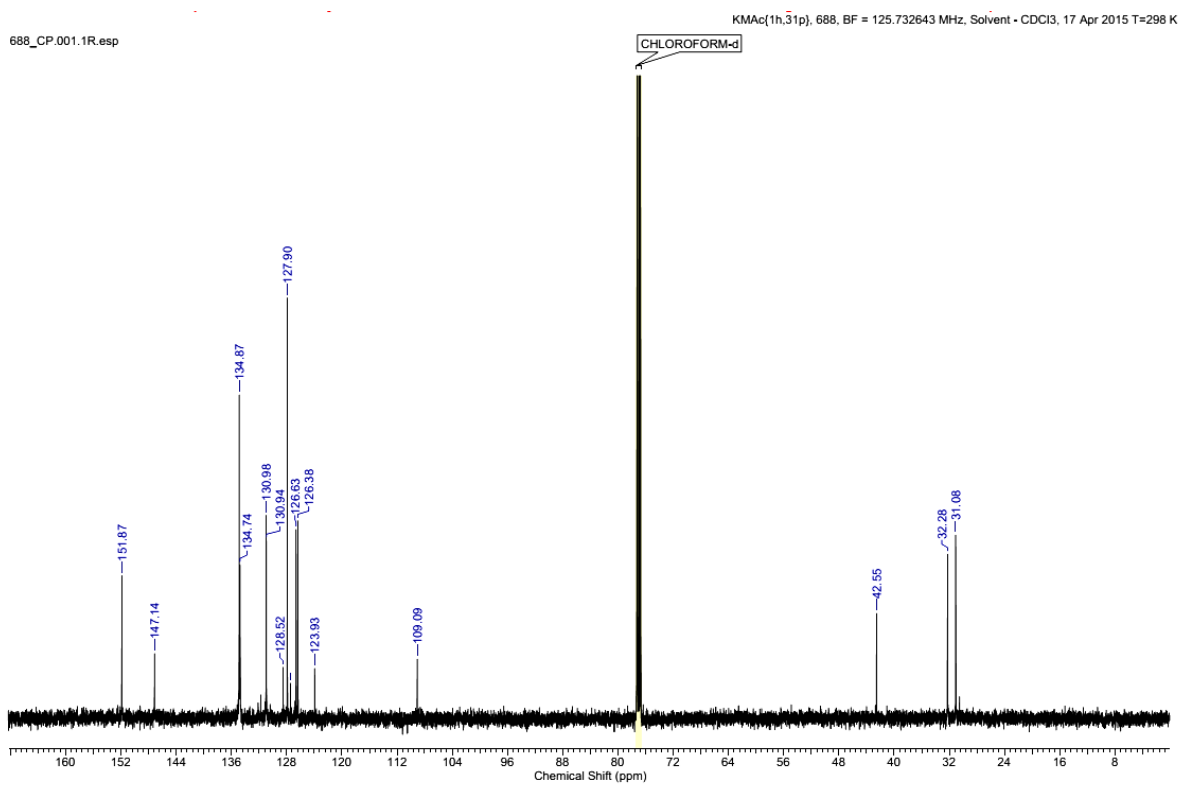

Fig. S21. <sup>13</sup>C{<sup>1</sup>H, <sup>31</sup>P} NMR spectrum of the compound **trans-8** (CDCl<sub>3</sub>).



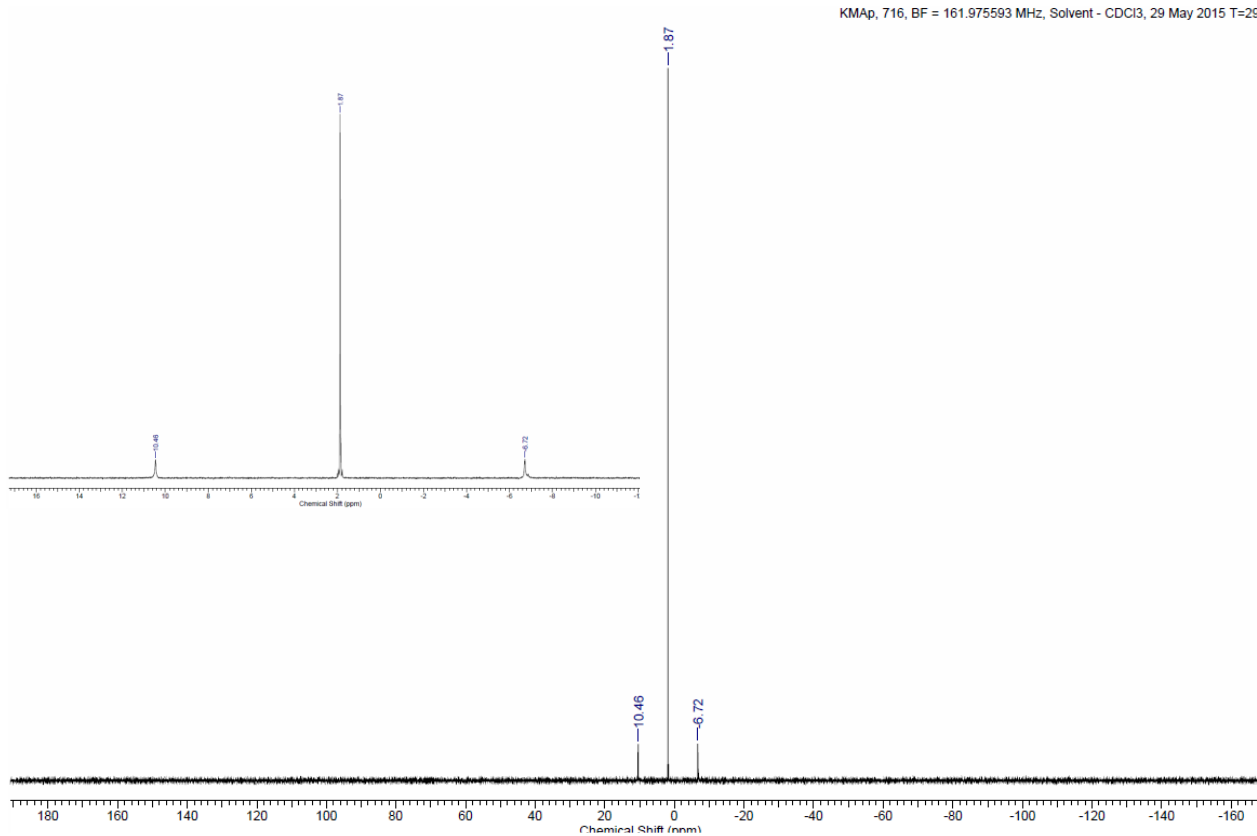

Fig. S22. <sup>31</sup>P{<sup>1</sup>H} NMR spectrum of the compound *trans*-8 (CDCl<sub>3</sub>).

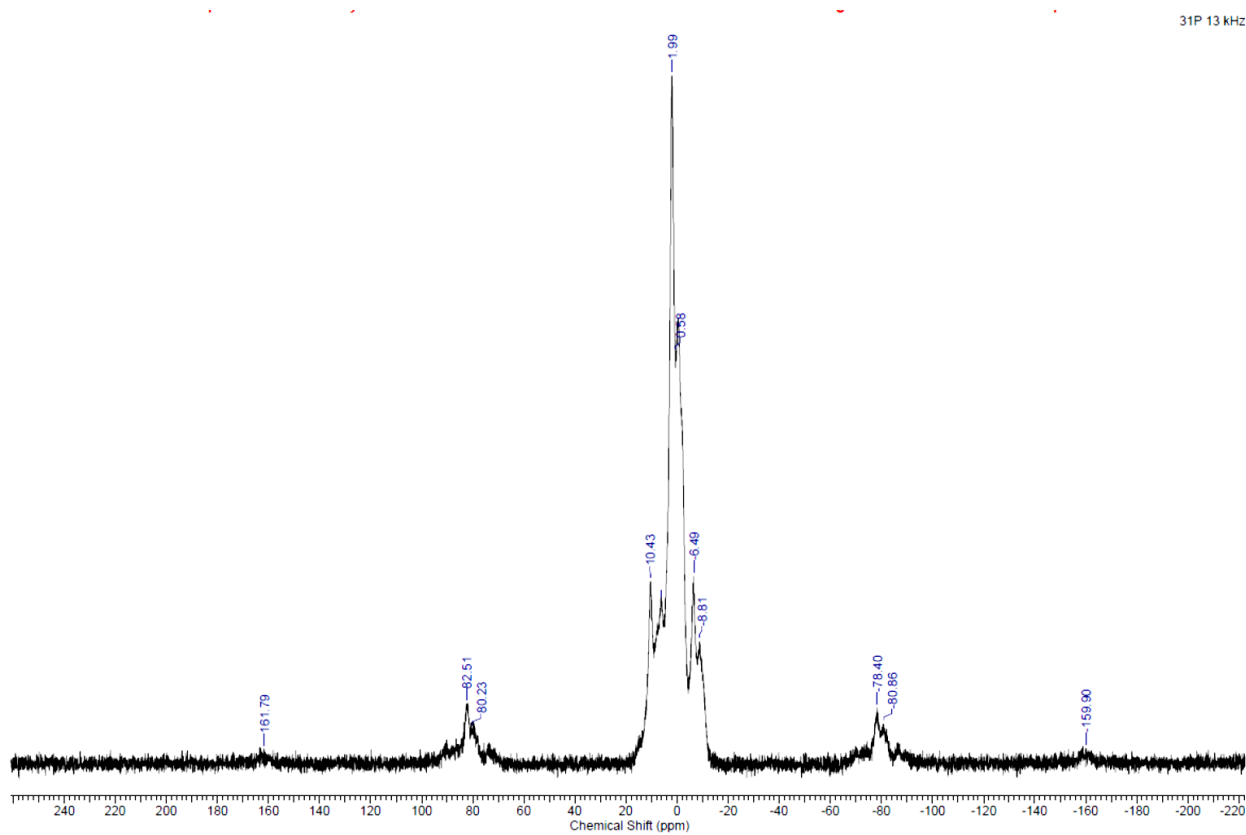

Fig. S23. <sup>31</sup>P MAS NMR spectrum of the compound *trans*-8.

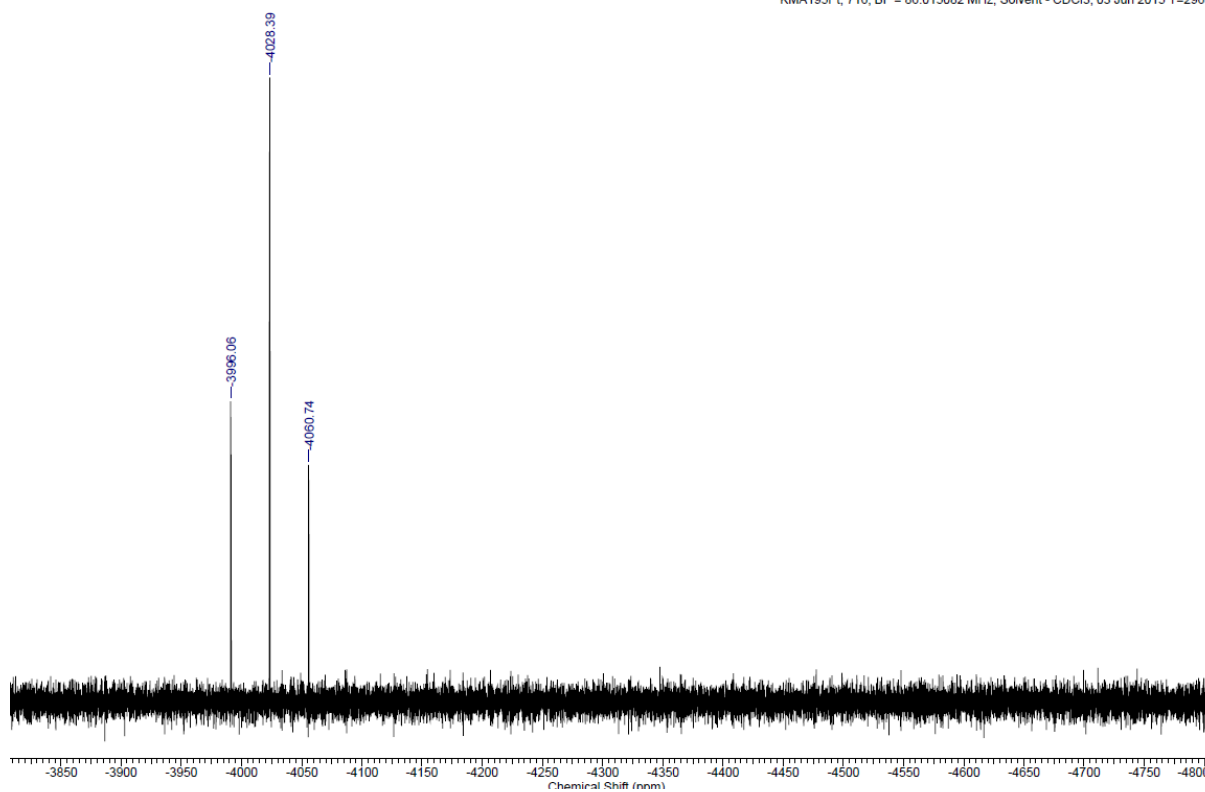

Fig. S24. <sup>195</sup>Pt NMR spectrum of the compound *trans*-**8** (CDCl<sub>3</sub>).

*cis-8*

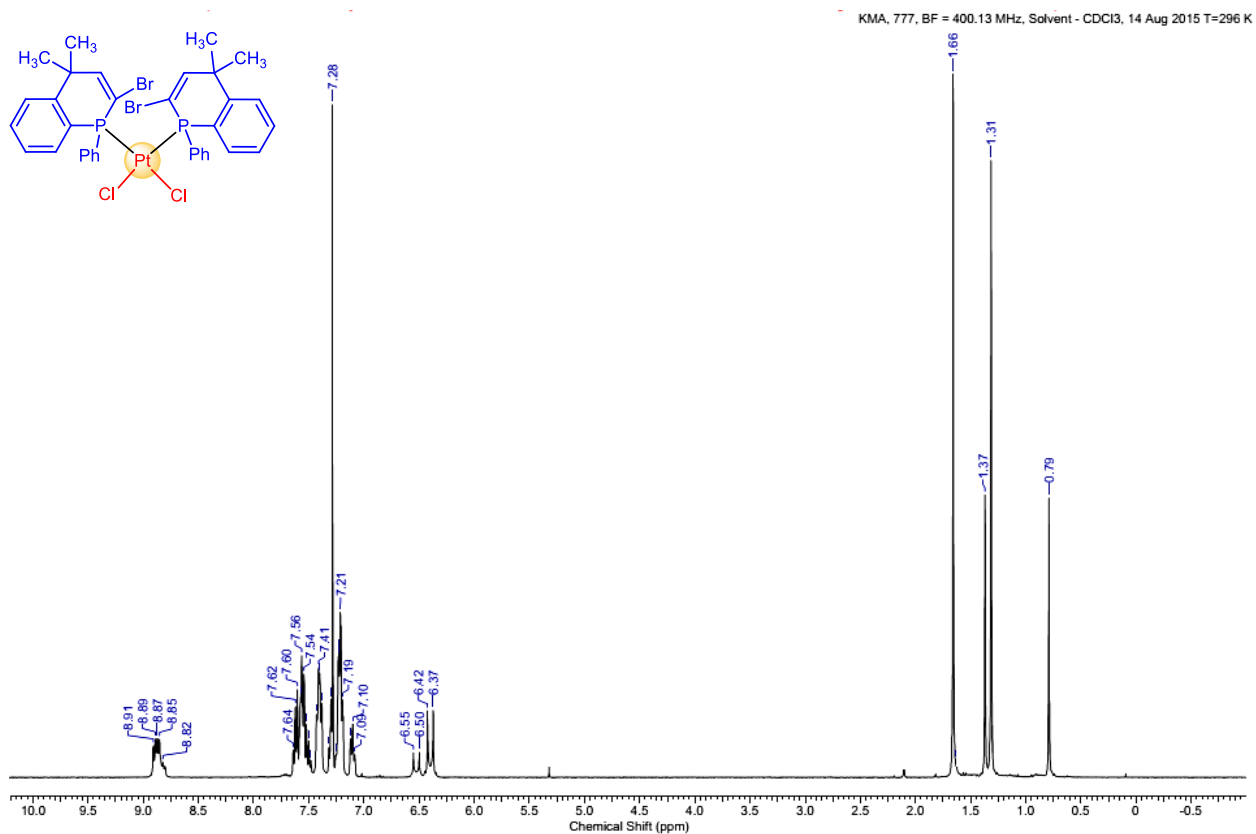

Fig. S25. <sup>1</sup>H NMR spectrum of the compound *cis-8* (CDCl<sub>3</sub>).

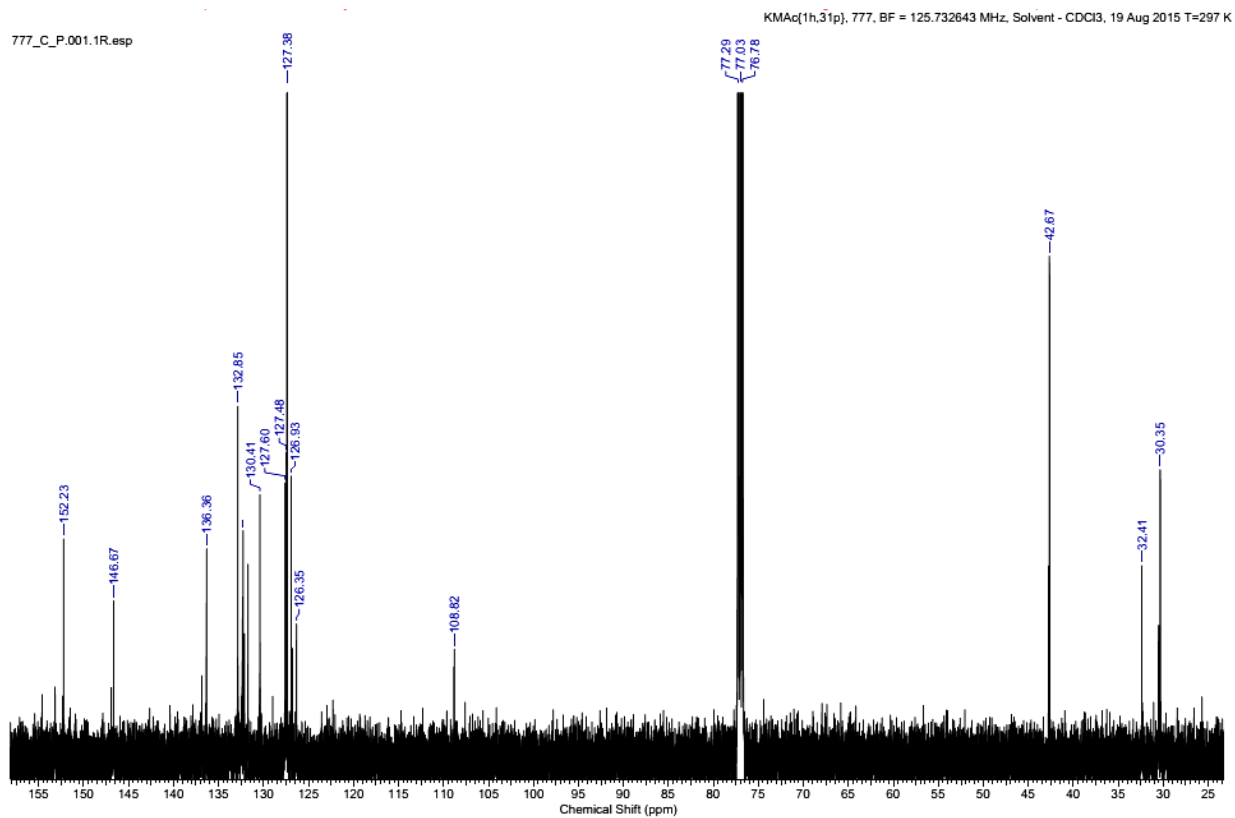

Fig. S26. <sup>13</sup>C{<sup>1</sup>H, <sup>31</sup>P} NMR spectrum of the compound *cis-8* (CDCl<sub>3</sub>).

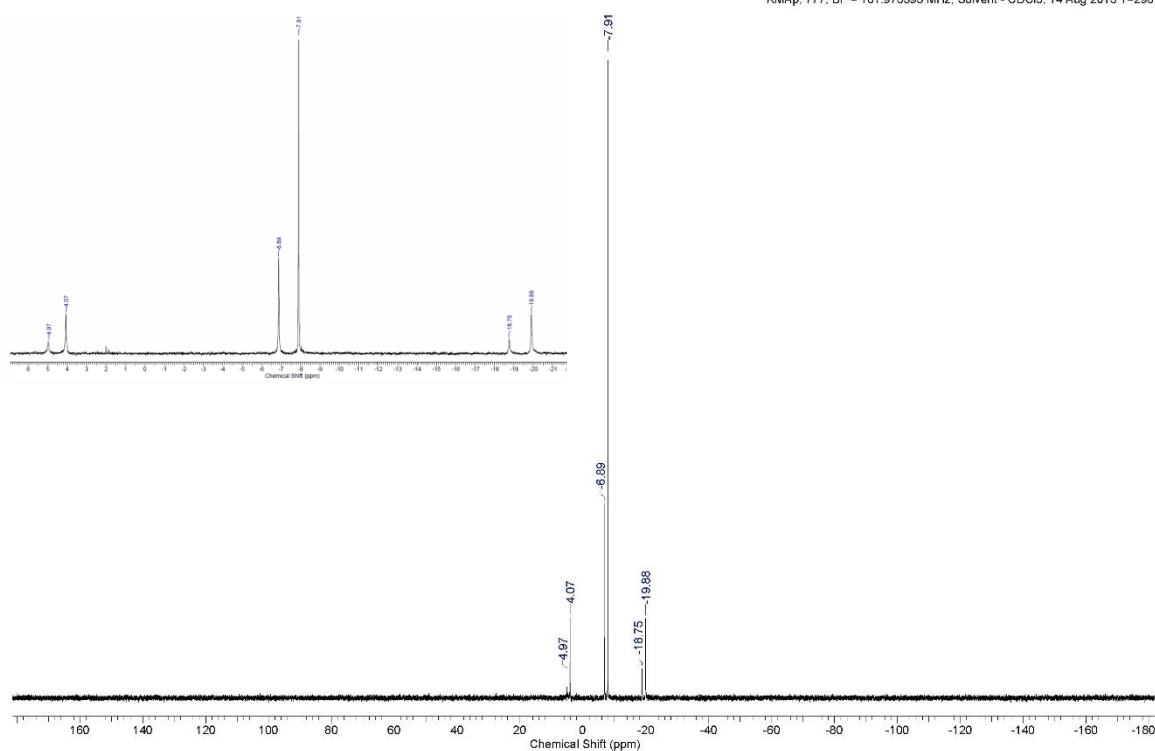

Fig. S27.  $^{31}\text{P}\{^1\text{H}\}$  NMR spectrum of the compound *cis-8* ( $\text{CDCl}_3$ ).

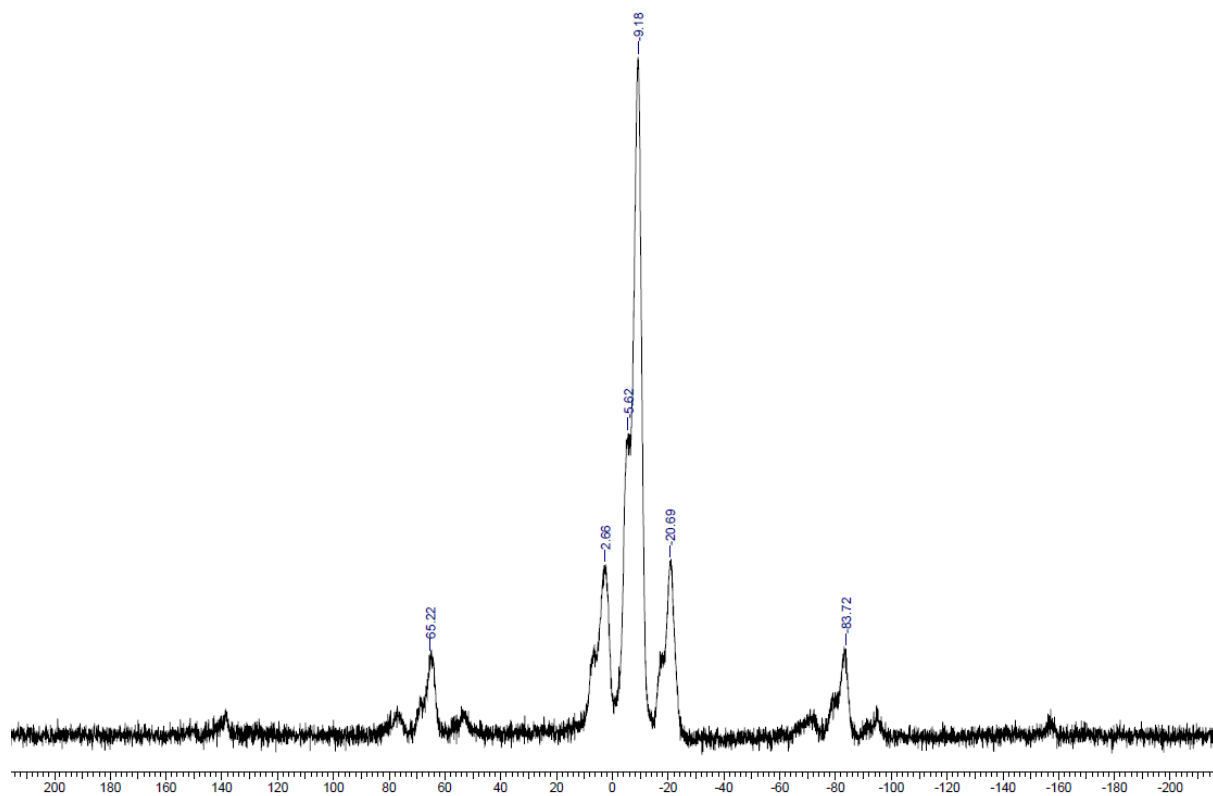

Fig. S28.  $^{31}\text{P}$  MAS NMR spectrum of the compound *cis-8*.

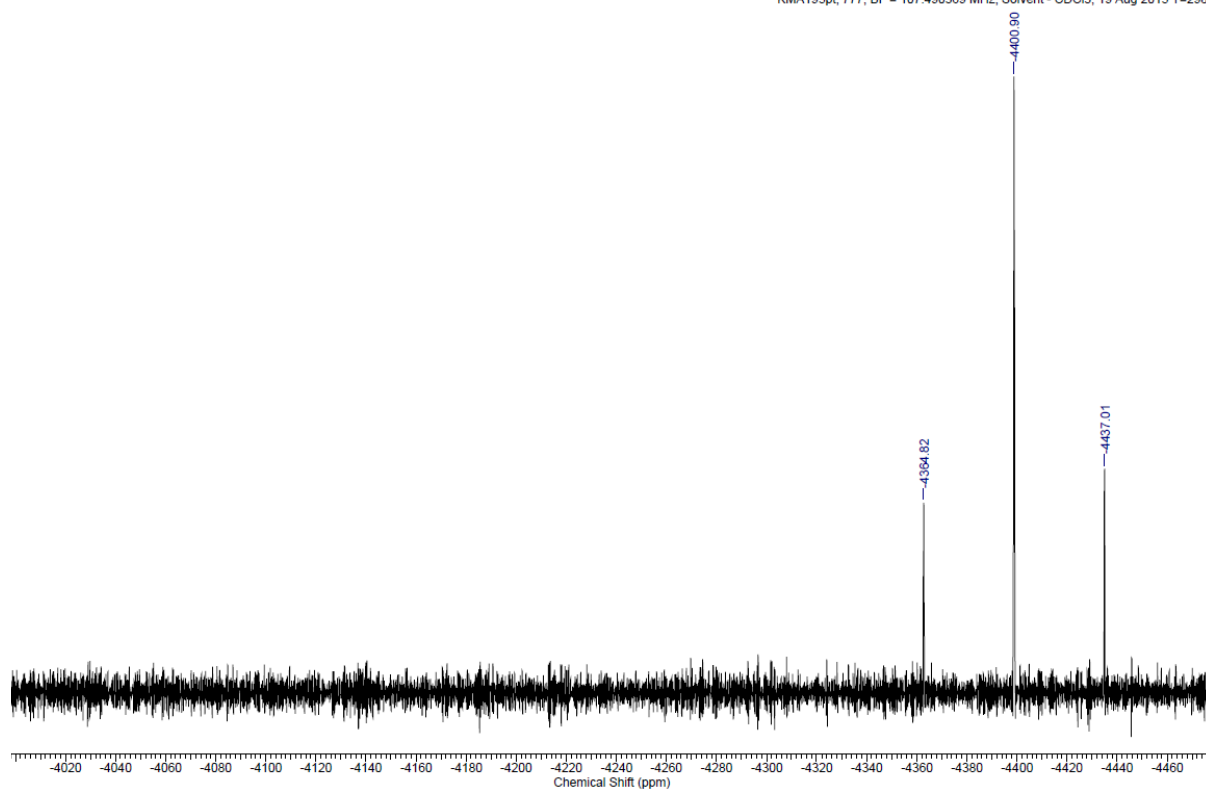

Fig. S29. <sup>195</sup>Pt NMR spectrum of the compound *cis*-**8** (CDCl<sub>3</sub>).
